# Supplementary material for: Mid-Gestation lethality of Atxn2l-Ablated Mice
Source: MDPI journal article supplement (doi:10.3390/ijms21145124), 2020-07-20
Supplement: s1 [file s1]

***Atxn2l*<sup>+/+</sup>**

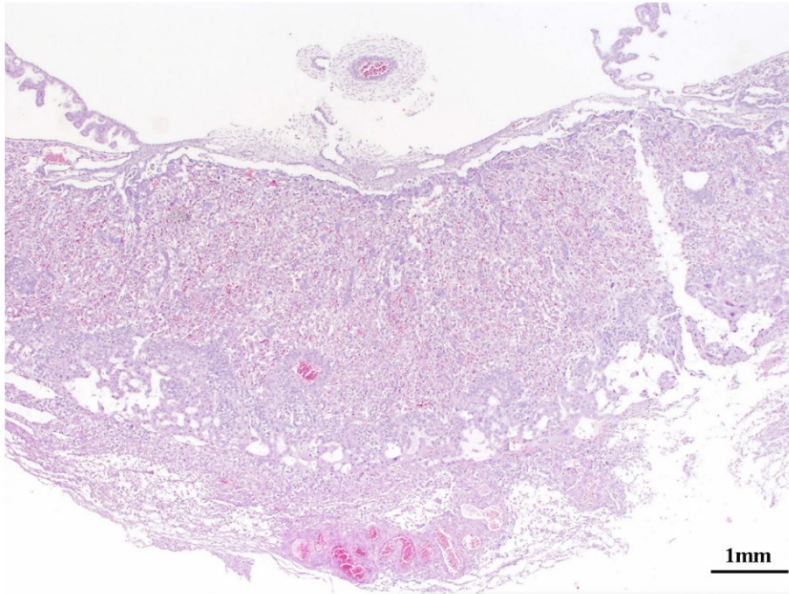

***Atxn2l*<sup>-/-</sup>**

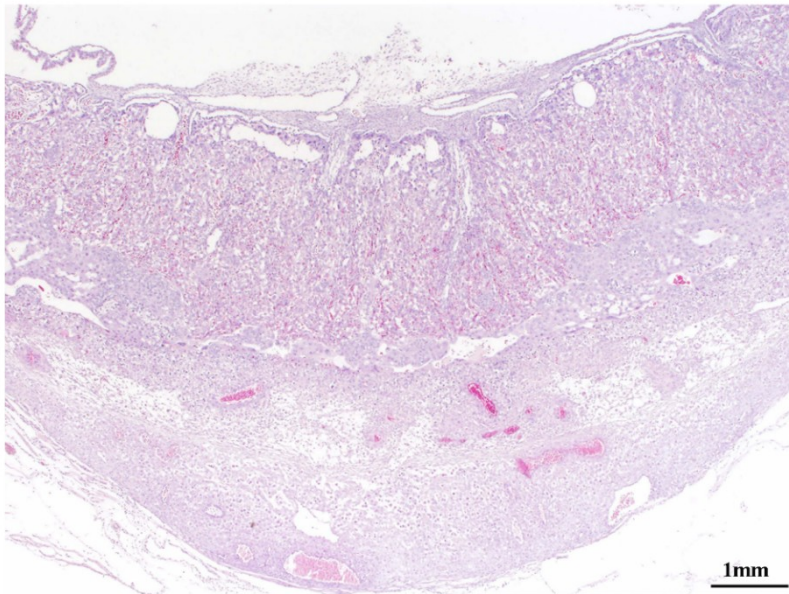

**Figure S1.** Histology (H&E stain) of placentas from an *Atxn2l*<sup>+/+</sup> embryo (upper image) and *Atxn2l*<sup>-/-</sup> (lower image) revealed no phenotype differences.

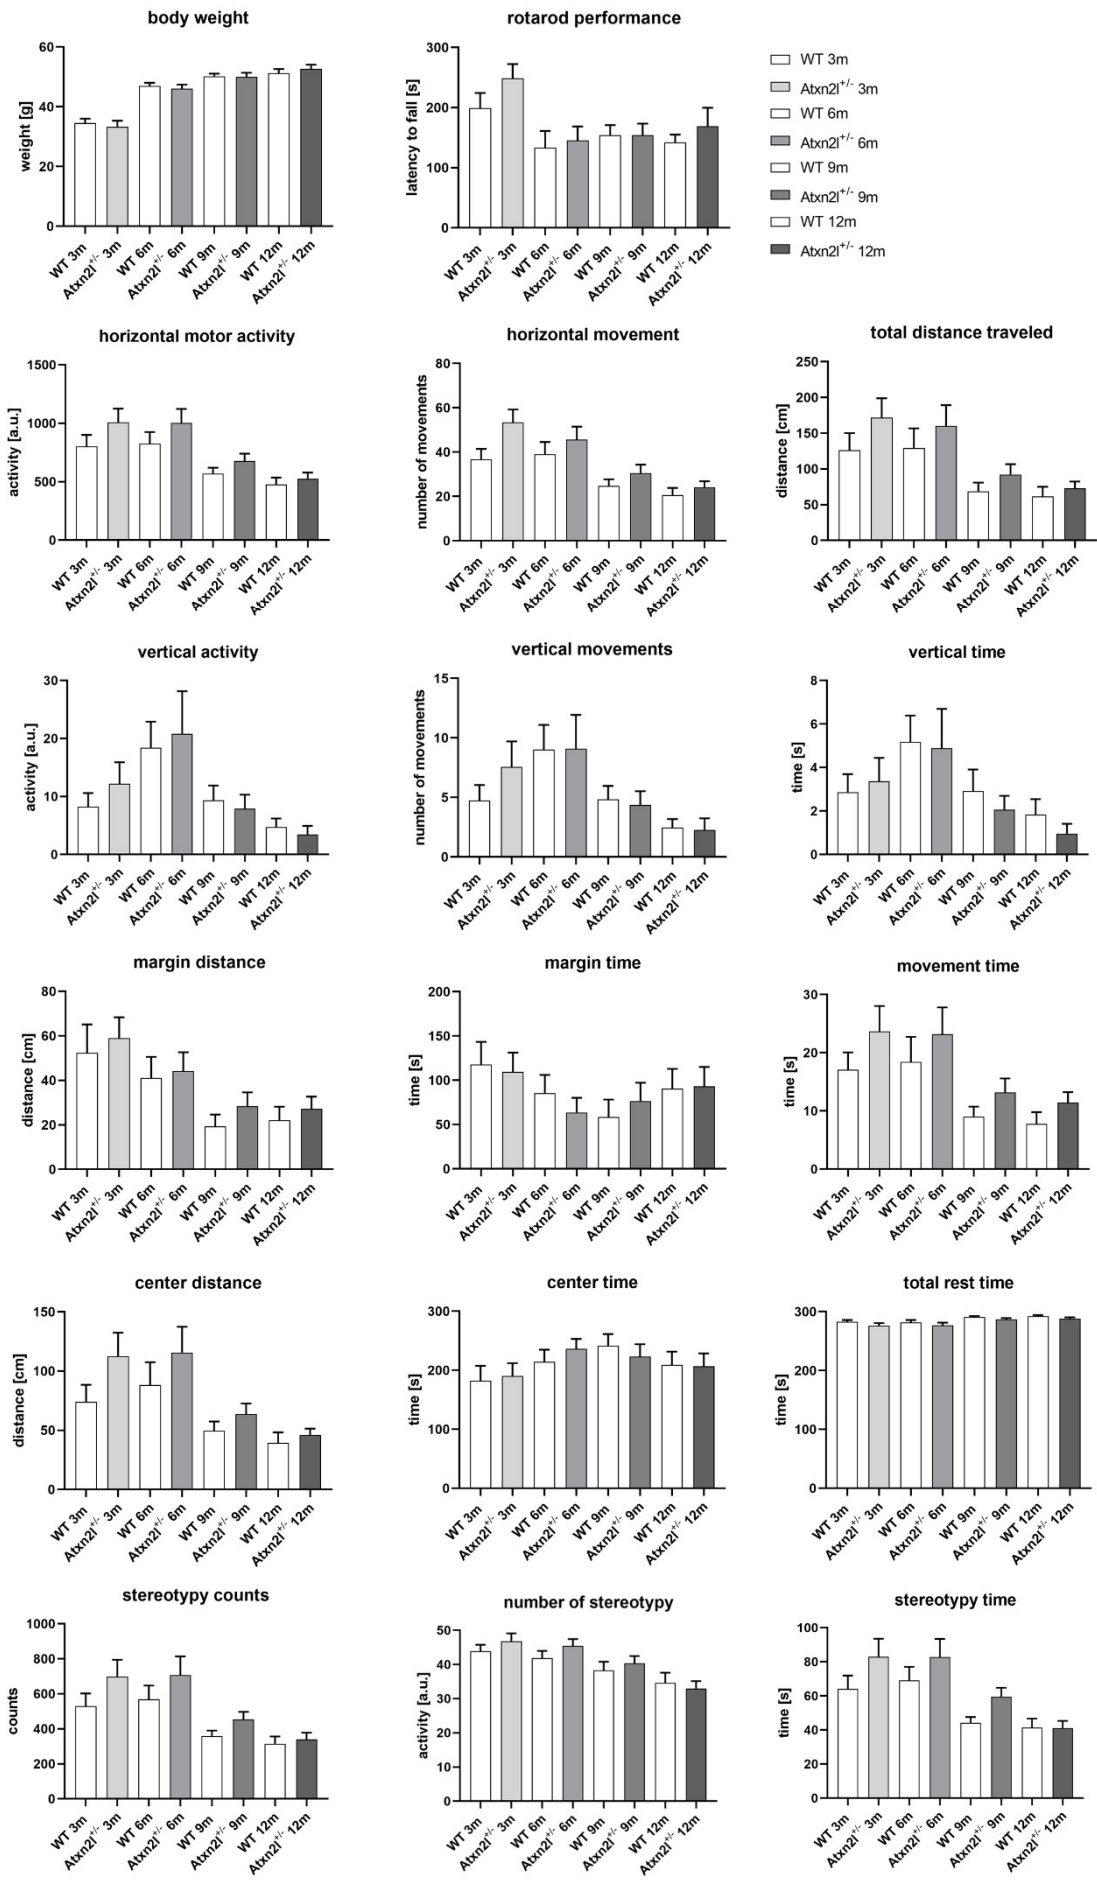

**Figure S2.** Locomotor performance in open-field tests, and in accelerating rotarod tests, as well as weight comparison between WT (white bars) and *Atxn2l<sup>+/-</sup>* (grey bars) mice at different ages, for 3 months, 6 months, 9 months, and 12 months. The diagrams show mean and s.e.m., the statistical evaluation was done with one-way ANOVA and revealed no significant changes by ATXN2L deficiency. Open field parameters quantified include horizontal motor activity, horizontal movement number, total distance travelled, vertical motor activity, vertical movement number, vertical movement time, distance traveled at margin or in corners of cage, time spent within 1 cm margin of cage walls, total time spent in movement, distance covered in the cage center, time spent in the cage center, total time spent in rest, count of beam breaks during a period of stereotypic activity, number of stereotypic activities, and total amount of time in stereotypic behavior. n=12vs12.

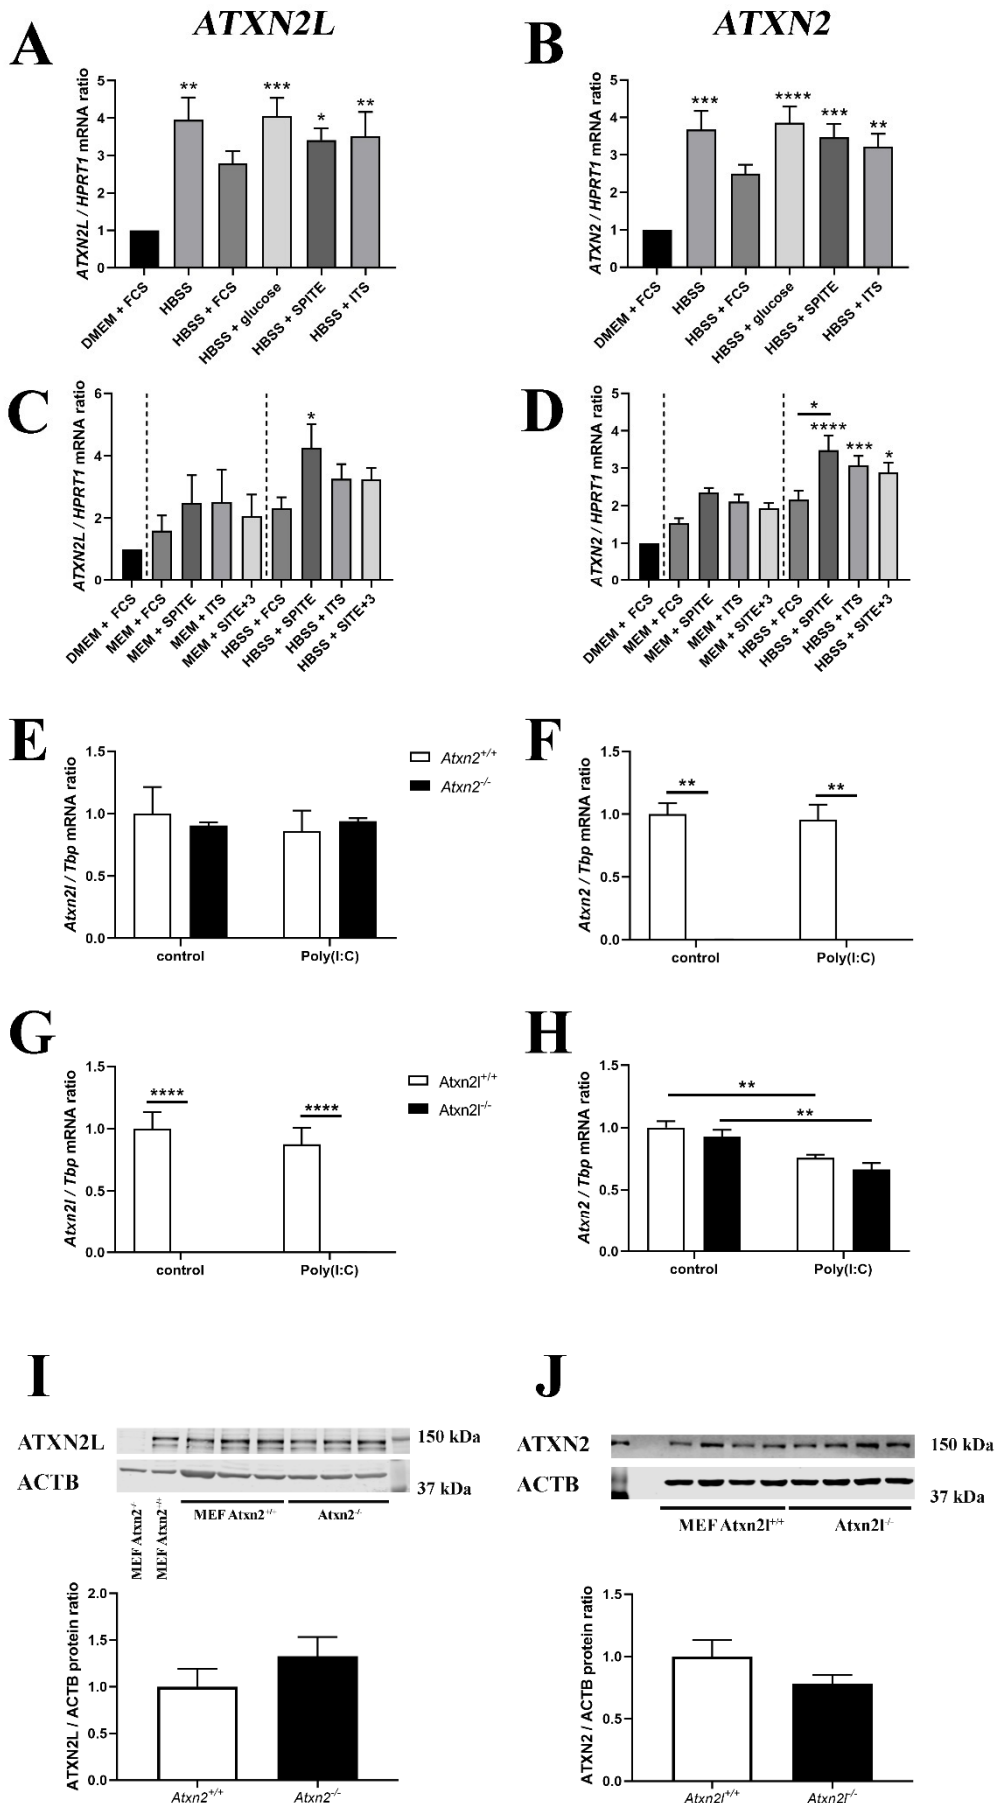

**Figure S3. (A, B)** The mRNA expressions of *ATXN2L* and *ATXN2* in human SH-SY5Y neuroblastoma cells were analyzed after incubation with starvation medium HBSS, again supplemented with 10% FCS and glucose, and now additionally with SPITE and ITS to test which component of FCS is crucial for the rescue of *ATXN2L* induction (n=5). **(C/D)** Incubation in MEM medium and HBSS in comparison, supplemented with FCS, SPITE, ITS and SPITE+3. MEM as basal medium contains more nutrients than HBSS and resulted in less strong inductions (n with MEM=3, n with HBSS=5). **(E/F)** *Atxn2l* and *Atxn2* mRNA expression in MEF with Knock-Out of *Atxn2* after incubation with the double-stranded RNA-analogue Poly(I:C). *Atxn2l* expression was unchanged in the absence of *Atxn2*, as well as after incubation with Poly(I:C). *Atxn2* mRNA was not detectable in Knock-Out MEF (n= 3 WT vs 3 *Atxn2*<sup>-/-</sup> lines). **(G/H):** *Atxn2l* and *Atxn2* mRNA expression in MEF with Knock-Out of *Atxn2* after incubation with Poly(I:C). *Atxn2l* expression was not detected in mutant MEF and *Atxn2* responded slightly upon exposure (n = 4 WT vs. 4 *Atxn2*<sup>-/-</sup> lines). **(I/J)** ATXN2 protein levels in *Atxn2*<sup>-/-</sup> MEF (n=4) were unchanged, as well as ATXN2L protein levels in *Atxn2*<sup>-/-</sup> MEF (n=3) versus littermate wildtype controls. Bar diagrams below visualize the quantification, variance, and lack of significance. Statistical testing was done by unpaired t-test with Welch's correction, one-way or two-way ANOVA, significance levels were illustrated by asterisks: \* p < 0.05; \*\* p < 0.01; \*\*\* p < 0.001; \*\*\*\* p < 0.0001. Comparison was always done versus nutrient abundance control condition if not stated otherwise.
